# Supplementary material
Source: publisher figshare collection journal article supplement (https://aacr.figshare.com/articles/dataset/_/22425931)
Supplement: Supplementary file 1 [file 39872227]

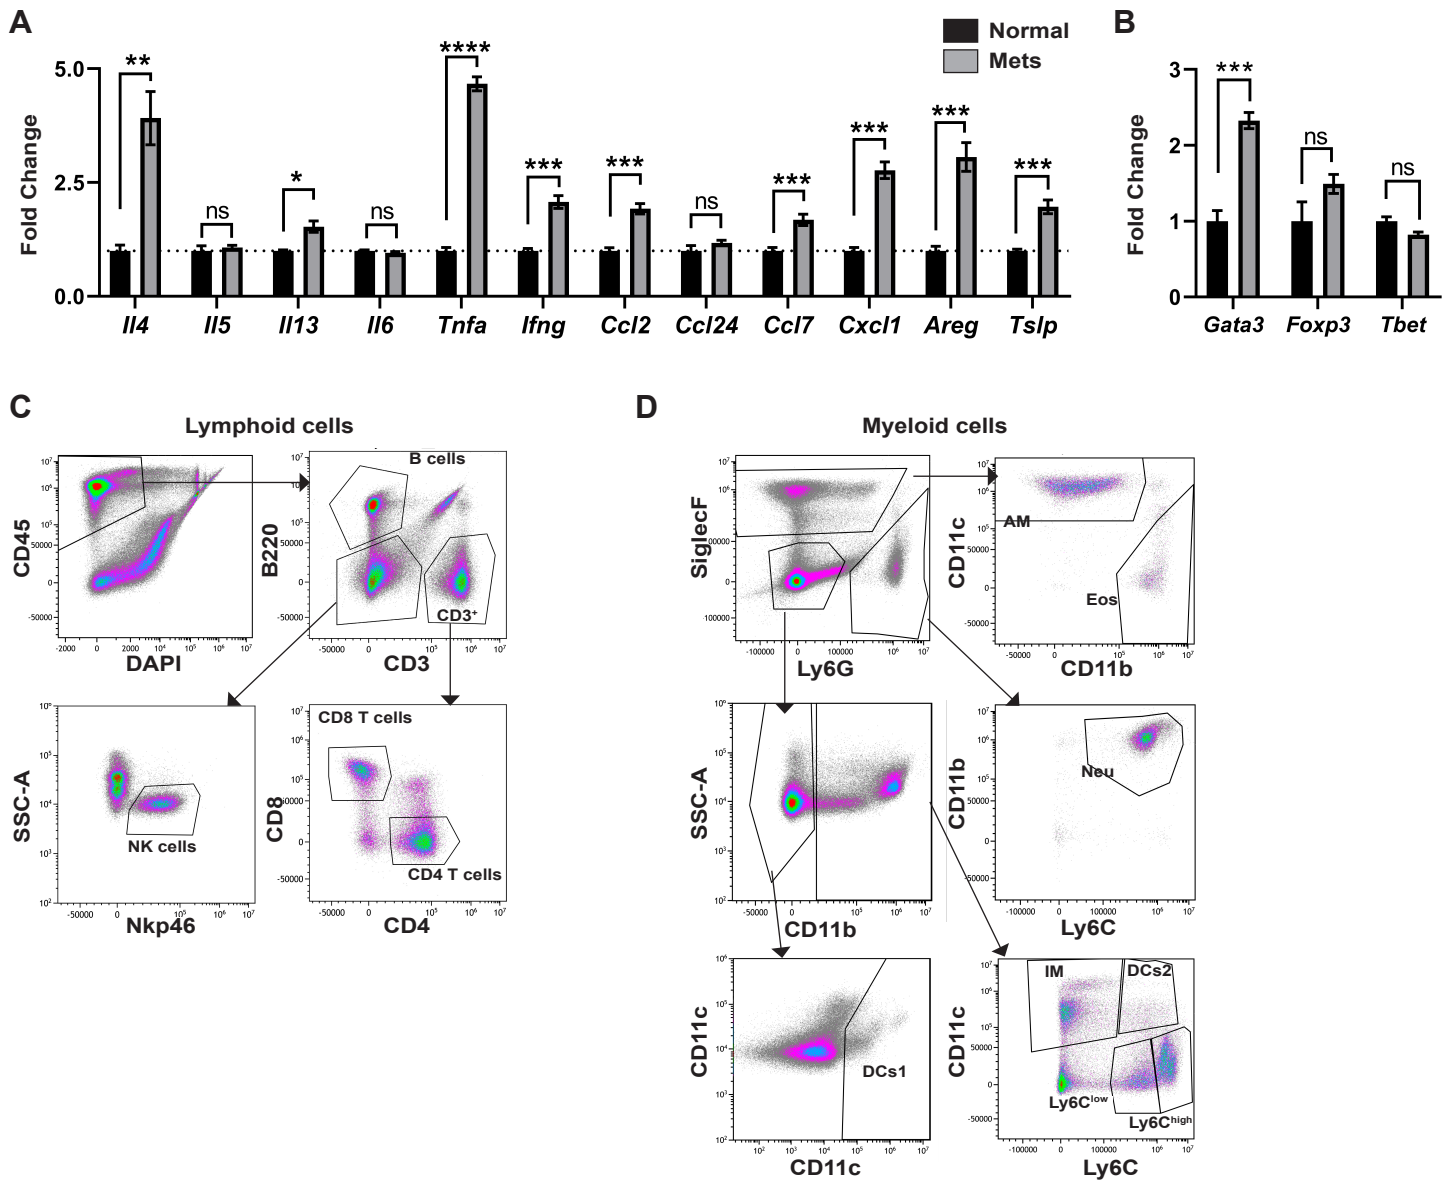

**Supplementary Figure S2. Lung metastases formation is characterized by extensive modifications in the immune milieu. (A,B)** qRT-PCR analysis of *Il33* downstream genes (A) and immune related transcription factors (B) in total lungs derived from MMTV-PyMT mice bearing lung metastases (n=3) and normal controls (n=3). Data are presented as mean  $\pm$  SD of technical repeats; Multiple t-tests with Welch's correction, FDR(Q)=5% and Fold Change > 1.5. \* $q < 0.05$  \*\* $q < 0.01$ , \*\*\* $q < 0.001$ , \*\*\*\* $q < 0.0001$ , ns-not significant. **(C,D)** Gating strategy for flow cytometry of lymphoid (C) and myeloid (D) immune cell populations in mice lungs.
